# Supplementary material
Source: publisher site journal article supplement (https://www.dovepress.com/article/supplementary_file/589283/589283%20Revised%20Supplementary%20Material.docx)
Supplement: Supplementary file 1 [file 589283%20Revised%20Supplementary%20Material.docx]

Supplementary Material for the Life Autonomy and Coherence Scale (LAC-Scale)

Supplementary Procedure 1. Instrument Development and Validation Process

A.1 Instrument Development and Theoretical Framework

The Life Autonomy and Coherence Scale (LAC-Scale) was developed to assess individuals’ perceived capacity for self-directed living, daily adjustment, and meaningful goal pursuit. Its conceptual model integrates Antonovsky’s Sense of Coherence theory³, Pearlin & Schooler’s Mastery model⁴, and the Person–Environment–Occupation (PEO) framework from occupational science. A systematic review of six validated instruments—covering *quality of life, self-efficacy, recovery orientation, occupational balance, and valuation of life*—provided theoretical anchors for item generation (Supplementary Table S2).

A.2 Detailed Development Process

*Step 1 – Systematic Literature Review and Initial Item Selection*

A review of six established scales identified overlapping and unique constructs related to autonomy, coherence, and meaningful living. From this review, 55 candidate items were generated—each mapped to one of three conceptual domains: (1) Life Autonomy, (2) Life Meaning and Goals, and (3) Social Connectedness. These scales included the Care Receiver Self-Efficacy Scale²⁶, Recovery Self-Assessment (RSA)²⁷, Assessment of Quality of Life (AQoL-8D)²⁸, Occupational Balance Questionnaire (OBQ)²⁹, and the Valuation of Life Scale³⁰.

Example items included: > “You actively participate in matters related to your own health care.” (Autonomy)

> “You often communicate your condition to medical staff to assist their decisions.” (Connectedness)

> “There are still things you would like to accomplish in life.” (Meaning)

*Step 2 – Expert Screening and First Revision*

Four domain experts (two psychologists, one occupational therapist, and one gerontology researcher) independently reviewed the 55 items for relevance, clarity, and theoretical balance. After discussion and item reduction, 25 items were retained to form the first draft of the scale. These were refined linguistically and theoretically to ensure consistency with the Socio-Ecological Model and Cognitive–Behavioral Framework, resulting in an East-Asian adapted version emphasizing family interdependence and collective values. The refinement process followed established methodological guidance for scale development and cross-cultural adaptation of self-report instruments²⁵,³¹–³².

*Step 3 – Multidisciplinary Expert Validation*

A multidisciplinary panel of 10 Taiwanese experts reviewed the 25-item first draft, producing the second version of the LAC-Scale. Two Delphi rounds were conducted to evaluate item quality and cultural fit.

Supplementary Table S1

| Discipline | n | Professional Role / Affiliation |
| --- | --- | --- |
| Occupational therapy (education) | 3 | University faculty in rehabilitation & instrument development |
| Community long-term care OT | 3 | Practicing OTs in dementia & stroke care programs |
| Mental-health rehabilitation | 2 | Clinical psychologists / psychiatric OTs |
| Special education & disability support | 1 | Senior teacher with adaptive-training experience |
| Neurorehabilitation | 1 | Hospital-based specialist in motor recovery |

Experts rated **relevance, clarity, and cultural adequacy** (4-point scale). Average inter-rater agreement was high (0.85), indicating strong consensus on item relevance and cultural appropriateness.

*Step 4 – Pilot Testing*

A pilot study (N = 47) included 25 older adults (65–83 yrs) and 22 family caregivers (38–61 yrs; average care duration 9 yrs). Participants rated each item for comprehension and clarity (mean = 4.6 / 5). Qualitative feedback indicated that items were understandable, concise, and culturally relevant.

*Step 5 – Finalization and Administration Guidelines*

Minor semantic revisions were made for readability. The **final 25-item version** adopted a **6-point Likert scale (1 = Strongly disagree → 6 = Strongly agree)**, without a neutral midpoint, to reduce central-tendency bias and increase response sensitivity. Average completion time: **5–6 minutes**; suitable for self-report or interviewer-assisted administration.

A.3 Validation and Psychometric Evaluation

A community sample (N = 305; M = 44.47 ± 18.20; 68.2 % female) completed the LAC-Scale and criterion measures (PRIFOR, HLS-EU, WHOQOL-BREF). Exploratory factor analysis (Principal Axis Factoring with Promax rotation; Parallel Analysis with 1 000 bootstraps) revealed a two-factor model (KMO = 0.97; Bartlett’s χ² = 8 956.0, p < 0.001):

- **F1 – Life Autonomy & Daily Coherence (11 items; loadings 0.52–0.93)**

- **F2 – Life Meaning & Social Connectedness (10 items; loadings 0.52–0.97)**

Four items (< 0.50 loading) were removed. Total variance explained = 68.5 %.

A.4 Ethical Considerations

Approved by the Institutional Review Board of National Cheng Kung University Hospital (IRB A-ER-112-632). All participants signed informed consent per the Declaration of Helsinki³³.

Supplementary Tables

Supplementary Table S2. Reference Instruments for LAC-Scale Development

| No. | Instrument | Theoretical Focus | Reliability / Validity | Conceptual Link to LAC-Scale |
| --- | --- | --- | --- | --- |
| 1 | **Care Receiver Self-Efficacy Scale²⁶** | Self-efficacy of care recipients | α = .95; 4 factors, 69.8% variance | Life Autonomy / Social Connectedness / Daily Coherence |
| 2 | **RSA-R: Person in Recovery Version²⁷** | Recovery-oriented practices and empowerment | α = .93; r(test-retest) = .88 | Life Autonomy / Life Meaning / Social Connectedness |
| 3 | **RSA-R: Family Member Version²⁷** | Family inclusion and advocacy in recovery care | α = .91; 5 factors | Social Connectedness / Life Meaning |
| 4 | **AQoL-8D²⁸** | Health-related quality of life | α = .89; CFI = .96; RMSEA = .05 | Criterion validity with Life Autonomy & Coherence |
| 5 | **Occupational Balance Questionnaire (OBQ-11) ²⁹** | Balance in daily activities | α = .89; ICC = .93 | Daily Coherence / Life Autonomy / Life Meaning |
| 6 | **Valuation of Life Scale (VOL) ³⁰** | Life meaning and affirmation | α = .82–.87; r = .83 | Life Meaning / Daily Coherence |

Supplementary Table S3. Item Generation and Content Validity Summary

| Stage | Process | Output | Example Items |
| --- | --- | --- | --- |
| Literature Review | 6 reference instruments reviewed | 55 items generated | “Participate in own care decisions”; “Still have life goals to pursue” |
| Expert Panel I | Four reviewers refined item pool | 25 items retained (I-CVI ≥ .80) | Simplified and culturally adapted phrasing |
| Expert Panel II | 10 experts (Delphi validation) | 25 items validated (S-CVI = .92) | Minor linguistic and conceptual refinements |
| Pilot Testing | Cognitive interview (n = 47) | 25 items confirmed | Minor wording adjustments |

Supplementary Table S4. Original 55 Items of the Life Autonomy and Coherence Scale (LAC-Scale)

| **Domain 1 – Life Autonomy** | |
| --- | --- |
| **No.** | **Items labeled (English Translation) were originally sourced from Chinese.** |
| 1 | You actively participate in all matters related to your body care. ( English Translation) |
| 2 | You are willing to try new ways of care. ( English Translation) |
| 3 | You actively seek to understand your own health problems. ( English Translation) |
| 4 | You actively participate in decisions about your care. ( English Translation) |
| 5 | When you don’t understand something, you can ask the professionals who care for you. ( English Translation) |
| 6 | You try to understand your current health condition as much as possible. ( English Translation) |
| 7 | You have learned methods that help you not depend on others. ( English Translation) |
| 8 | You often tell your doctor about your health to assist proper treatment. ( English Translation) |
| 9 | What you are doing now is useful for improving your health. ( English Translation) |
| 10 | If I want to, I can change my therapist. ( English Translation) |
| 11 | Therapists believe I can make my own decisions about where to live, when to work, and who to be friends with. ( English Translation) |
| 28 | You have developed some new interests. ( English Translation) |
| 29 | You still enjoy learning new things. ( English Translation) |
| 30 | You know how to apply the knowledge and skills taught by professionals. ( English Translation) |
| 31 | The knowledge and skills you learned from your therapist can be applied to yourself. ( English Translation) |
| 32 | Therapists believe I can recover. ( English Translation) |
| 33 | Therapists believe I can handle my own symptoms. ( English Translation) |
| 34 | This program provides services tailored to my unique culture and life experiences. ( English Translation) |
| 35 | When I want to, I have the opportunity to discuss my spiritual needs and interests. ( English Translation) |
| 36 | When I want to, I have the opportunity to discuss my sexual needs and interests. ( English Translation) |
| 37 | Therapists help me develop and plan life goals beyond just managing symptoms (e.g., work, education, exercise, social ties, interests). ( English Translation) |
| 38 | I am encouraged to participate in evaluating this program and its providers. ( English Translation) |
| 39 | Regarding care, you feel your opinion is as important as that of healthcare professionals. ( English Translation) |
| 40 | Your opinions about how to take care of yourself are usually accepted by professionals. ( English Translation) |
| **Domain 2 – Life Meaning and Goals** | |
| **No.** | **Items labeled (English Translation) were originally sourced from Chinese.** |
| 12 | You try to cooperate with your caregiver’s schedule. ( English Translation) |
| 13 | You try to understand your caregiver’s needs and problems. ( English Translation) |
| 14 | You try to find things you can do for your caregiver. ( English Translation) |
| 15 | You have your own leisure activities so your caregiver doesn’t need to worry. ( English Translation) |
| 16 | When you have something to say to your caregiver, he/she listens carefully. ( English Translation) |
| 17 | Your biggest fear is becoming a burden to others. ( English Translation) |
| 18 | You feel you have lost your freedom. ( English Translation) |
| 19 | When you need help, you can accept others’ assistance. ( English Translation) |
| 20 | You can make contributions to those around you. ( English Translation) |
| 21 | You can participate in meaningful activities. ( English Translation) |
| 22 | How often do you feel socially excluded or ignored? ( English Translation) |
| 23 | How easy or difficult is it for you to move around your neighborhood alone? ( English Translation) |
| 24 | Does your health condition affect your role in groups? ( English Translation) |
| 25 | How well do you communicate with others? ( English Translation) |
| 26 | How easy or difficult is it for you to move around (using needed aids)? ( English Translation) |
| 27 | Therapists regularly ask about my interests and community participation. ( English Translation) |
| 54 | Your caregiver asks you to help with things you can do. ( English Translation) |
| 55 | You cherish every day you have. ( English Translation) |
| **Domain 3 – Social Connectedness** | |
| **No.** | **Items labeled (English Translation) were originally sourced from Chinese.** |
| 41 | Therapists help include important people in my recovery plan. ( English Translation) |
| 42 | Therapists welcome me and help me feel comfortable in this program. ( English Translation) |
| 43 | Staff talk with me about what it would take to complete or exit this program. |
| 44 | Staff help me keep track of the progress I am making towards my personal goals. |
| 45 | Staff work hard to help me fulfill my personal goals. |
| 46 | Staff listen and respond to my cultural experiences, interests, and concerns. |
| 47 | Staff are knowledgeable about special interest groups and activities in the community. |
| 48 | Staff encourage me to have hope and high expectations for myself and my recovery. |
| 49 | There is a balance between things I do for myself and things I do for others. |
| 50 | I make sure I do things I really want to do. |
| 51 | I balance the different kinds of activities in my life, e.g., work, household chores, leisure, rest, and sleep. |
| 52 | I am satisfied with the amount of time that I spend on my various daily activities. |
| 53 | There is enough variation between things that I must do and things that I want to do. |

Supplementary Table S5. Mapping of 25-Item LAC-Scale (Final Version) to Original 55 Items

| **No.** | **Final LAC-Scale Item** | **Corresponding Original 55 Item No.** |
| --- | --- | --- |
| 1 | I actively manage my daily routines and activity arrangements. | 1, 4, 9 |
| 2 | I participate in various activities to enrich my life and enhance my sense of achievement. | 20, 21, 28 |
| 3 | When I encounter new areas in life, I am eager to learn new things. | 29, 30, 31 |
| 4 | Whether through speech, sign language, or writing, I believe I have good communication skills when interacting with others. | 25 |
| 5 | In my living environment, going out alone (such as shopping or visiting others) is easy for me. | 23 |
| 6 | When I face difficulties in life, I can receive the help I need. | 19 |
| 7 | When someone offers help to solve my problems in life, I am willing to accept it. | 19 |
| 8 | I take the initiative to understand my physical, mental, and spiritual health. | 3, 6 |
| 9 | My health condition affects my role and participation in groups (such as resident, sports, or community groups). | 24 |
| 10 | I am satisfied with how I allocate my time among daily routines, work, and leisure. | 52 |
| 11 | I try to align my daily schedule with that of other family members. | 12 |
| 12 | When needed, I discuss my personal interests, psychological, or emotional conditions with others. | 35 |
| 13 | I am afraid of becoming a burden to others. | 17 |
| 14 | When facing difficulties in life, I seek assistance from professionals (e.g., doctors, therapists, or coaches). | 5, 3 |
| 15 | When providing services, professionals consider including my support network (e.g., family, friends, or neighbors) in their plans. | 41 |
| 16 | Professionals not only help me improve my symptoms but also assist me in planning my future life or maintaining my current lifestyle (e.g., work, education, exercise, connecting with family/friends, or hobbies). | 37 |
| 17 | Professionals believe that I am capable of managing my own symptoms. | 33 |
| 18 | Professionals can assess my current situation and help me monitor my progress toward achieving personal goals. | 44 |
| 19 | The professional services I receive reflect my unique life experiences and cultural background. | 34, 46 |
| 20 | Through interactions with professionals, I can internalize and apply the knowledge and skills I have learned in my own life. | 30, 31 |
| 21 | When discussing how to improve my life difficulties, my opinions and suggestions are accepted by professionals. | 39, 40 |
| 22 | I feel there is a clear gap between what I have to do and what I truly want to do. | 53 |
| 23 | What I do in my life now aligns with my inner will and personal values. | 50 |
| 24 | If my lifestyle needs to change, I am willing to try new ways of living. | 2, 29 |
| 25 | I believe in cherishing the present, living in the moment, and enjoying each day of life. | 55 |

Supplementary Table S6. Final LAC-Scale Item List and Factor Loadings

| F | Construct Label | Factor Loading | Domain |
| --- | --- | --- | --- |
| 1–10, 25 | Life Autonomy and Daily Coherence | 0.52–0.93 | F1 |
| 14–23 | Life Meaning and Social Connectedness | 0.52–0.97 | F2 |

Supplementary Table S7. Descriptive Statistics and Item Distribution

| Range | Mean (SD) | Skewness | Kurtosis | Ceiling (%) | Floor (%) |
| --- | --- | --- | --- | --- | --- |
| 4.11–4.71 | ±1.3 | −1.04 to −0.21 | −1.00 to 0.70 | 15.5–37.2 | 1.6–7.4 |

Supplementary Table S8. Exploratory Factor Analysis and Inter-Factor Correlations

| Factor | Eigenvalue | Explained Variance (%) | r (F1–F2) |
| --- | --- | --- | --- |
| 1 | 16.33 | 65.33 | 0.61 (p < 0.001) |
| 2 | 0.73 | 3.20 | — |

Supplementary Table S9. Reliability Indices

| Subscale | Cronbach’s α | McDonald’s ω | Item-Total Correlation |
| --- | --- | --- | --- |
| Life Autonomy & Daily Coherence | 0.962 | 0.963 | 0.54–0.91 |
| Life Meaning & Social Connectedness | 0.961 | 0.962 | 0.64–0.91 |
| Total Scale | 0.977 | 0.977 | — |
